# Supplementary material for: Impact of financial incentives on viral suppression among adults initiating HIV treatment in Tanzania: a hybrid effectiveness–implementation trial
Source: PubMed Central journal article supplement (PMC11457171; doi:10.1016/s2352-3018(24)00149-8), 2024-08-01
Supplement: NIHMS2021906-supplement-Appendix_2.pdf [file NIHMS2021906-supplement-Appendix_2.pdf]

# THE LANCET HIV

## Supplementary appendix 2

This appendix formed part of the original submission and has been peer reviewed. We post it as supplied by the authors.

Supplement to: Njau PF, Katararo E, Winters S, et al. Impact of financial incentives on viral suppression among adults initiating HIV treatment in Tanzania: a hybrid effectiveness–implementation trial. *Lancet HIV* 2024; published online Aug 1. [https://doi.org/10.1016/S2352-3018\(24\)00149-8](https://doi.org/10.1016/S2352-3018(24)00149-8).

**Supplementary Table 1.** Effects of financial incentives on retention on ART and viral suppression at 6 and 12 months, excluding all Kagera facilities, Tanzania 2021-2023

|                                                               | <b>N</b> | <b>Financial incentives proportion</b> | <b>Comparison proportion</b> | <b>Intent-to-treat analysis Risk Difference (95% CI)</b> |
|---------------------------------------------------------------|----------|----------------------------------------|------------------------------|----------------------------------------------------------|
| <b>Six months</b>                                             |          |                                        |                              |                                                          |
| Retained on ART                                               | 1577     | 0.941                                  | 0.875                        | <b>0.067 (0.033,0.100)</b>                               |
| Virally suppressed (<1000 cp/mL) and retained on ART          | 1357     | 0.908                                  | 0.831                        | <b>0.080 (0.036,0.120)</b>                               |
| Virally suppressed (<1000 cp/mL), among those retained on ART | 1215     | 0.973                                  | 0.979                        | -0.005 (-0.023,0.012)                                    |
| Virally suppressed (<50 cp/mL) and retained on ART            | 1357     | 0.843                                  | 0.743                        | <b>0.103 (0.046,0.160)</b>                               |
| Virally suppressed (<50 cp/mL), among those retained on ART   | 1215     | 0.902                                  | 0.875                        | 0.029 (-0.012,0.069)                                     |
| Proportion of visits attended on time                         | 1577     | 0.898                                  | 0.792                        | <b>0.113 (0.068,0.158)</b>                               |
| <b>Twelve months</b>                                          |          |                                        |                              |                                                          |
| Retained on ART                                               | 1577     | 0.879                                  | 0.805                        | <b>0.074 (0.014,0.130)</b>                               |
| Virally suppressed (<1000 cp/mL) and retained on ART*         | 1503     | 0.854                                  | 0.782                        | <b>0.073 (0.006,0.140)</b>                               |
| Virally suppressed (<1000 cp/mL), among those retained on ART | 1257     | 0.977                                  | 0.986                        | -0.008 (-0.021,0.004)                                    |
| Virally suppressed (<50 cp/mL) and retained on ART            | 1503     | 0.788                                  | 0.705                        | <b>0.084 (0.021,0.150)</b>                               |
| Virally suppressed (<50 cp/mL), among those retained on ART   | 1257     | 0.901                                  | 0.889                        | 0.014 (-0.018,0.046)                                     |
| Proportion of visits attended on time                         | 1577     | 0.859                                  | 0.767                        | <b>0.098 (0.051,0.145)</b>                               |

**Supplementary Table 2.** Effects of financial incentives on retention on ART and viral suppression at 6 and 12 months, excluding two Kagera facilities with a higher proportion of migrant workers, Tanzania 2021-2023

|                                                               | <b>N</b> | <b>Financial incentives proportion</b> | <b>Comparison proportion</b> | <b>Intent-to-treat analysis Risk Difference (95% CI)</b> |
|---------------------------------------------------------------|----------|----------------------------------------|------------------------------|----------------------------------------------------------|
| <b>Six months</b>                                             |          |                                        |                              |                                                          |
| Retained on ART                                               | 1903     | 0.945                                  | 0.893                        | <b>0.057 (0.027,0.087)</b>                               |
| Virally suppressed (<1000 cp/mL) and retained on ART          | 1668     | 0.911                                  | 0.855                        | <b>0.063 (0.024,0.101)</b>                               |
| Virally suppressed (<1000 cp/mL), among those retained on ART | 1515     | 0.970                                  | 0.978                        | -0.009 (-0.024,0.006)                                    |
| Virally suppressed (<50 cp/mL) and retained on ART            | 1668     | 0.846                                  | 0.750                        | <b>0.100 (0.053,0.147)</b>                               |
| Virally suppressed (<50 cp/mL), among those retained on ART   | 1515     | 0.900                                  | 0.859                        | <b>0.039 (0.005,0.074)</b>                               |
| Proportion of visits attended on time                         | 1903     | 0.894                                  | 0.797                        | <b>0.098 (0.057,0.138)</b>                               |
| <b>Twelve months</b>                                          |          |                                        |                              |                                                          |
| Retained on ART                                               | 1903     | 0.884                                  | 0.834                        | <b>0.056 (0.003,0.109)</b>                               |
| Virally suppressed (<1000 cp/mL) and retained on ART*         | 1818     | 0.858                                  | 0.806                        | <b>0.058 (0.001,0.114)</b>                               |
| Virally suppressed (<1000 cp/mL), among those retained on ART | 1550     | 0.976                                  | 0.978                        | -0.004 (-0.016,0.009)                                    |
| Virally suppressed (<50 cp/mL) and retained on ART            | 1818     | 0.785                                  | 0.728                        | <b>0.060 (0.003,0.118)</b>                               |
| Virally suppressed (<50 cp/mL), among those retained on ART   | 1550     | 0.892                                  | 0.884                        | 0.006 (-0.023,0.035)                                     |
| Proportion of visits attended on time                         | 1903     | 0.850                                  | 0.772                        | <b>0.077 (0.033,0.121)</b>                               |

**Supplementary Table 3.** Effects of financial incentives on retention on ART with viral suppression (primary outcome), using multiple imputation, Tanzania 2021-2023

|                                                      | N    | Financial incentives proportion | Comparison proportion | Intent-to-treat analysis        |                            |                            |
|------------------------------------------------------|------|---------------------------------|-----------------------|---------------------------------|----------------------------|----------------------------|
|                                                      |      |                                 |                       | Pooled Risk Difference (95% CI) |                            |                            |
|                                                      |      |                                 |                       | (1)                             | (2)                        | (3)                        |
| <b>Six months</b>                                    |      |                                 |                       |                                 |                            |                            |
| Virally suppressed (<1000 cp/mL) and retained on ART | 1990 | 0.903                           | 0.850                 | <b>0.053 (0.015,0.091)</b>      | <b>0.052 (0.013,0.091)</b> | <b>0.056 (0.016,0.097)</b> |
| <b>Twelve months</b>                                 |      |                                 |                       |                                 |                            |                            |
| Virally suppressed (<1000 cp/mL) and retained on ART | 1990 | 0.849                           | 0.804                 | 0.045 (-0.011,0.100)            | 0.035 (-0.018,0.088)       | 0.042 (-0.012,0.097)       |
| <i>Region FE</i>                                     |      |                                 |                       | X                               | X                          | X                          |
| <i>Facility level</i>                                |      |                                 |                       |                                 | X                          | X                          |
| <i>log ART initiates</i>                             |      |                                 |                       |                                 | X                          | X                          |
| <i>Proximity to major road</i>                       |      |                                 |                       |                                 | X                          | X                          |
| <i>Distance to major city</i>                        |      |                                 |                       |                                 | X                          | X                          |
| <i>Age, years</i>                                    |      |                                 |                       |                                 |                            | X                          |
| <i>Gender</i>                                        |      |                                 |                       |                                 |                            | X                          |
| <i>WHO clinical stage</i>                            |      |                                 |                       |                                 |                            | X                          |

Linear probability models were used to estimate adjusted risk differences (RD) and 95% confidence intervals (CI), with robust standard errors clustered by clinic, for 20 multiply imputed datasets. Pooled estimates are presented here. RDs significant at the alpha=0.05 level are in bold. Covariates included in the models are marked with an X.
